# Supplementary material for: A Cohort Study of the Influence of the 12-Component Modified Japanese Diet Index on Oral and Gut Microbiota in the Japanese General Population
Source: MDPI journal article supplement (doi:10.3390/nu16040524), 2024-02-13
Supplement: s1 [file s1]

Supplementary Table S1. The amount of change in foods and food groups intake from 2018 to 2018.

|                             | L <sub>1</sub> -L <sub>2</sub><br>(n = 156) | H <sub>1</sub> -L <sub>2</sub><br>(n = 65) | L <sub>1</sub> -H <sub>2</sub><br>(n = 42) | H <sub>1</sub> -H <sub>2</sub><br>(n = 133) | p-value |
|-----------------------------|---------------------------------------------|--------------------------------------------|--------------------------------------------|---------------------------------------------|---------|
| Soybeans and soybean foods  | 0.5 (-6.8-8.6)                              | -3.1 (-12.8-4.3)                           | 5.2 (-5.0-15.1)                            | 4.2 (-8.9-18.0)                             | 0.014   |
| Green and yellow vegetables | -0.4 (-9.3-9.3)                             | -5.5 (-17.6-3.3)                           | 1.3 (-10.6-18.2)                           | -1.4 (-17.6-15.4)                           | 0.061   |
| Fruit                       | 0.0 (-6.6-7.9)                              | -3.0 (-13.6-6.5)                           | 3.0 (-5.8-16.4)                            | 0.4 (-11.8-11.2)                            | 0.275   |
| Fish and shellfish          | -0.9 (-8.4-12.7)                            | -2.8 (-16.4-6.0)                           | 7.7 (-11.5-17.6)                           | 2.1 (-10.6-19.7)                            | 0.105   |
| Pickles                     | 0.0 (-1.2-1.0)                              | -0.2 (-2.8-0.1)                            | 0.1 (-1.6-1.4)                             | 0.0 (-2.5-1.5)                              | 0.208   |
| Mushrooms                   | 0.1 (-1.2-1.4)                              | -1.3 (-4.2-0.3)                            | 0.6 (-0.5-2.6)                             | 0.2 (-1.7-2.9)                              | <0.001  |
| Seaweeds                    | 0.0 (-1.8-1.5)                              | -2.1 (-5.3-0.5)                            | 0.6 (-1.0-6.5)                             | 0.0 (-3.7-3.4)                              | <0.001  |
| Green tea                   | 0.0 (-14.9-12.4)                            | 0.0 (-21.3-24.6)                           | 1.8 (-4.5-37.9)                            | -1.4 (-31.5-36.4)                           | 0.271   |
| Rice                        | -4.3 (-46.0-25.1)                           | -9.1 (-39.5-17.8)                          | 0.0 (-22.3-25.2)                           | -3.4 (-28.2-26.7)                           | 0.658   |
| Miso soup                   | 0.0 (-24.5-26.5)                            | -5.6 (-38.6-14.5)                          | 0.1 (-20.7-15.6)                           | -3.5 (-26.0-23.7)                           | 0.408   |
| Beef and pork               | 0.0 (-4.5-5.6)                              | 1.0 (-2.5-10.4)                            | -0.3 (-9.3-2.2)                            | 0.0 (-2.7-5.2)                              | 0.101   |
| Coffee                      | 2.9 (-22.1-31.8)                            | 0.4 (-17.1-50.0)                           | 0.7 (-13.6-17.4)                           | -0.3 (-19.7-14.7)                           | 0.464   |

Median (range). L<sub>1</sub>-L<sub>2</sub>: mJDI12 ≤ 6 in 2017 and 2018; H<sub>1</sub>-L<sub>2</sub>: mJDI12 ≥ 7 in 2017 and ≤6 in 2018; L<sub>1</sub>-H<sub>2</sub>: mJDI12 ≤ 6 in 2017 and mJDI12 ≥ 7 in 2018; H<sub>1</sub>-H<sub>2</sub>: mJDI12 ≥ 7 in 2017 and 2018.

Supplementary Table S2. Correlation of the amount of the change for one year between food and bacteria abundance (L1-L2).

|      |                                       | Soybeans and<br>soybean foods | Green/yellow<br>vegetables | Fruit  | Fish/shellfish | Pickles | Mushrooms | Seaweeds | Green tea | Rice   | Miso soup | Beef and<br>pork | Coffee |
|------|---------------------------------------|-------------------------------|----------------------------|--------|----------------|---------|-----------|----------|-----------|--------|-----------|------------------|--------|
| Oral | Genus                                 |                               |                            |        |                |         |           |          |           |        |           |                  |        |
|      | <i>Alloprevotella</i>                 | -0.070                        | 0.096                      | -0.135 | -0.045         | -0.067  | 0.085     | 0.141    | 0.107     | 0.083  | 0.082     | -0.028           | -0.013 |
| Gut  | Phylum                                |                               |                            |        |                |         |           |          |           |        |           |                  |        |
|      | <i>Firmicutes</i>                     | 0.052                         | -0.103                     | 0.065  | -0.138         | 0.074   | 0.145     | -0.010   | -0.087    | 0.099  | -0.030    | 0.019            | -0.017 |
|      | <i>Actinobacteria</i>                 | -0.041                        | -0.017                     | -0.112 | 0.012          | 0.015   | -0.031    | 0.066    | 0.150     | 0.038  | 0.013     | -0.136           | -0.078 |
|      | Class                                 |                               |                            |        |                |         |           |          |           |        |           |                  |        |
|      | <i>Clostridia</i>                     | 0.066                         | -0.057                     | 0.026  | -0.136         | 0.082   | 0.169*    | 0.014    | -0.155    | 0.033  | -0.007    | 0.092            | -0.040 |
|      | <i>Negativicutes</i>                  | -0.159*                       | 0.098                      | -0.050 | 0.078          | -0.120  | -0.001    | -0.033   | 0.147     | 0.056  | 0.110     | -0.059           | 0.134  |
|      | <i>Actinobacteria</i>                 | -0.041                        | -0.017                     | -0.112 | 0.012          | 0.015   | -0.031    | 0.066    | 0.150     | 0.038  | 0.013     | -0.136           | -0.078 |
|      | Order                                 |                               |                            |        |                |         |           |          |           |        |           |                  |        |
|      | <i>Clostridiales</i>                  | 0.066                         | -0.057                     | 0.026  | -0.137         | 0.082   | 0.169*    | 0.014    | -0.155    | 0.034  | -0.007    | 0.091            | -0.039 |
|      | <i>Selenomonadales</i>                | -0.159*                       | 0.098                      | -0.050 | 0.078          | -0.120  | -0.001    | -0.033   | 0.147     | 0.056  | 0.110     | -0.059           | 0.134  |
|      | <i>Bifidobacteriales</i>              | -0.046                        | -0.045                     | -0.081 | 0.023          | -0.053  | -0.016    | 0.077    | 0.182*    | 0.045  | 0.034     | -0.149           | -0.052 |
|      | Family                                |                               |                            |        |                |         |           |          |           |        |           |                  |        |
|      | <i>Ruminococcaceae</i>                | 0.058                         | 0.001                      | -0.014 | -0.145         | 0.030   | 0.027     | -0.023   | -0.089    | 0.044  | -0.178*   | -0.141           | -0.101 |
|      | <i>Veillonellaceae</i>                | -0.169*                       | 0.023                      | -0.052 | 0.088          | -0.142  | -0.065    | -0.058   | 0.170*    | 0.059  | 0.107     | -0.026           | 0.071  |
|      | <i>Bifidobacteriaceae</i>             | -0.046                        | -0.045                     | -0.081 | 0.023          | -0.053  | -0.016    | 0.077    | 0.182*    | 0.045  | 0.034     | -0.149           | -0.052 |
|      | <i>Actinomycetaceae</i>               | -0.116                        | -0.098                     | -0.100 | 0.075          | 0.135   | -0.063    | -0.068   | 0.023     | -0.063 | -0.044    | 0.030            | -0.013 |
|      | Genus                                 |                               |                            |        |                |         |           |          |           |        |           |                  |        |
|      | <i>Faecalibacterium</i>               | 0.010                         | -0.032                     | 0.053  | -0.109         | 0.055   | -0.013    | 0.003    | 0.146     | 0.052  | 0.046     | -0.041           | -0.019 |
|      | <i>Gemmiger</i>                       | 0.093                         | 0.135                      | -0.010 | -0.063         | 0.056   | 0.045     | 0.023    | -0.030    | -0.077 | 0.001     | 0.050            | -0.048 |
|      | <i>Ruminococcus</i>                   | 0.104                         | 0.075                      | 0.045  | -0.035         | -0.077  | 0.047     | -0.006   | -0.143    | 0.009  | -0.152    | -0.103           | -0.057 |
|      | <i>Lachnospiraceae_incertae_sedis</i> | -0.205*                       | -0.197*                    | 0.006  | 0.072          | -0.044  | -0.047    | -0.022   | -0.011    | -0.100 | 0.061     | 0.082            | 0.090  |
|      | <i>Bifidobacterium</i>                | -0.047                        | -0.044                     | -0.082 | 0.023          | -0.054  | -0.016    | 0.077    | 0.181*    | 0.045  | 0.033     | -0.151           | -0.053 |
|      | <i>Actinomyces</i>                    | -0.129                        | -0.094                     | -0.095 | 0.076          | 0.134   | -0.059    | -0.064   | 0.041     | -0.063 | -0.042    | 0.033            | -0.017 |
|      | <i>Parabacteroides</i>                | -0.030                        | 0.063                      | 0.009  | 0.037          | 0.044   | -0.030    | -0.088   | -0.053    | -0.022 | -0.107    | -0.011           | 0.162* |

Spearman's rank correlation coefficient.

\*: q-value(False Discovery Rate (Benjamini &amp; Hochberg)) &lt; 0.05

Supplementary Table S3. Correlation of the amount of the change for one year between food and bacteria abundance (H1-L2).

|      |                                       | Soybeans and<br>soybean foods | Green/yellow<br>vegetables | Fruit  | Fish/shellfish | Pickles | Mushrooms | Seaweeds | Green tea | Rice    | Miso soup | Beef and<br>pork | Coffee |
|------|---------------------------------------|-------------------------------|----------------------------|--------|----------------|---------|-----------|----------|-----------|---------|-----------|------------------|--------|
| Oral | Genus                                 |                               |                            |        |                |         |           |          |           |         |           |                  |        |
|      | <i>Alloprevotella</i>                 | -0.093                        | -0.092                     | -0.037 | -0.030         | 0.039   | 0.122     | -0.073   | 0.145     | -0.285* | 0.085     | -0.055           | -0.025 |
| Gut  | Phylum                                |                               |                            |        |                |         |           |          |           |         |           |                  |        |
|      | <i>Firmicutes</i>                     | 0.114                         | -0.061                     | 0.142  | 0.050          | 0.135   | 0.013     | 0.199    | -0.201    | 0.044   | -0.198    | 0.151            | -0.027 |
|      | <i>Actinobacteria</i>                 | -0.036                        | -0.110                     | 0.094  | -0.076         | -0.130  | -0.249*   | -0.265*  | 0.087     | -0.124  | 0.018     | -0.202           | -0.193 |
|      | Class                                 |                               |                            |        |                |         |           |          |           |         |           |                  |        |
|      | <i>Clostridia</i>                     | 0.213                         | 0.025                      | 0.173  | -0.003         | 0.123   | -0.017    | 0.112    | -0.160    | 0.043   | -0.144    | 0.119            | -0.092 |
|      | <i>Negativicutes</i>                  | -0.202                        | 0.156                      | -0.191 | -0.062         | -0.025  | 0.024     | 0.070    | -0.212    | -0.017  | -0.029    | -0.033           | 0.063  |
|      | <i>Actinobacteria</i>                 | -0.036                        | -0.110                     | 0.094  | -0.076         | -0.130  | -.249*    | -.265*   | 0.087     | -0.124  | 0.018     | -0.202           | -0.193 |
|      | Order                                 |                               |                            |        |                |         |           |          |           |         |           |                  |        |
|      | <i>Clostridiales</i>                  | 0.213                         | 0.024                      | 0.172  | -0.004         | 0.122   | -0.017    | 0.113    | -0.160    | 0.044   | -0.144    | 0.119            | -0.091 |
|      | <i>Selenomonadales</i>                | -0.202                        | 0.156                      | -0.191 | -0.062         | -0.025  | 0.024     | 0.070    | -0.212    | -0.017  | -0.029    | -0.033           | 0.063  |
|      | <i>Bifidobacteriales</i>              | -0.067                        | -0.072                     | 0.083  | -0.021         | -0.074  | -0.110    | -0.147   | 0.129     | -0.139  | 0.053     | -0.215           | -0.146 |
|      | Family                                |                               |                            |        |                |         |           |          |           |         |           |                  |        |
|      | <i>Ruminococcaceae</i>                | 0.082                         | 0.048                      | 0.148  | -0.030         | -0.099  | -0.035    | -0.039   | 0.070     | -0.040  | 0.203     | 0.105            | -0.230 |
|      | <i>Veillonellaceae</i>                | -0.049                        | 0.000                      | -0.144 | 0.028          | -0.059  | -0.218    | -0.153   | -0.242    | -0.106  | -0.068    | -0.058           | 0.072  |
|      | <i>Bifidobacteriaceae</i>             | -0.067                        | -0.072                     | 0.083  | -0.021         | -0.074  | -0.110    | -0.147   | 0.129     | -0.139  | 0.053     | -0.215           | -0.146 |
|      | <i>Actinomycetaceae</i>               | -0.021                        | -0.017                     | 0.071  | -0.135         | 0.148   | -0.030    | 0.124    | 0.033     | 0.032   | 0.115     | 0.147            | -0.005 |
|      | Genus                                 |                               |                            |        |                |         |           |          |           |         |           |                  |        |
|      | <i>Faecalibacterium</i>               | 0.087                         | 0.079                      | 0.040  | -0.026         | 0.115   | 0.030     | 0.153    | -0.149    | -0.054  | 0.157     | -0.026           | 0.079  |
|      | <i>Gemmiger</i>                       | 0.153                         | -0.152                     | -0.025 | 0.032          | 0.153   | -0.046    | -0.126   | -0.126    | 0.094   | 0.274*    | 0.094            | -0.199 |
|      | <i>Ruminococcus</i>                   | -0.018                        | 0.103                      | -0.038 | 0.100          | -0.241  | 0.065     | 0.036    | 0.095     | -0.111  | 0.058     | 0.078            | -0.157 |
|      | <i>Lachnospiraceae_incertae_sedis</i> | -0.013                        | 0.203                      | 0.093  | 0.199          | 0.242   | -0.013    | -0.260*  | -0.186    | -0.122  | 0.127     | -0.115           | 0.020  |
|      | <i>Bifidobacterium</i>                | -0.067                        | -0.072                     | 0.083  | -0.021         | -0.074  | -0.110    | -0.147   | 0.129     | -0.139  | 0.053     | -0.215           | -0.146 |
|      | <i>Actinomyces</i>                    | -0.028                        | 0.000                      | 0.070  | -0.119         | 0.147   | -0.027    | 0.145    | 0.042     | 0.031   | 0.129     | 0.142            | -0.001 |
|      | <i>Parabacteroides</i>                | -0.111                        | -0.031                     | -0.098 | -0.071         | -0.025  | -0.048    | 0.051    | 0.030     | 0.101   | 0.131     | -0.080           | 0.101  |

Spearman's rank correlation coefficient.

\*: q-value(False Discovery Rate (Benjamini &amp; Hochberg)) &lt; 0.05

Supplementary Table S4. Correlation of the amount of the change for one year between food and bacteria abundance (L1-H2).

|      |                                       | Soybeans and<br>soybean foods | Green/yellow<br>vegetables | Fruit  | Fish/shellfish | Pickles | Mushrooms | Seaweeds | Green tea | Rice   | Miso soup | Beef and<br>pork | Coffee |
|------|---------------------------------------|-------------------------------|----------------------------|--------|----------------|---------|-----------|----------|-----------|--------|-----------|------------------|--------|
| Oral | Genus                                 |                               |                            |        |                |         |           |          |           |        |           |                  |        |
|      | <i>Alloprevotella</i>                 | -0.183                        | -0.010                     | 0.176  | 0.166          | 0.103   | 0.018     | 0.256    | -0.166    | -0.268 | 0.150     | 0.263            | -0.276 |
| Gut  | Phylum                                |                               |                            |        |                |         |           |          |           |        |           |                  |        |
|      | <i>Firmicutes</i>                     | 0.001                         | 0.075                      | 0.002  | 0.155          | 0.267   | -0.210    | 0.270    | -0.091    | -0.106 | -0.126    | -0.033           | -0.097 |
|      | <i>Actinobacteria</i>                 | 0.082                         | 0.382*                     | -0.258 | -0.075         | -0.113  | 0.167     | -0.212   | 0.052     | 0.067  | -0.040    | 0.260            | 0.078  |
|      | Class                                 |                               |                            |        |                |         |           |          |           |        |           |                  |        |
|      | <i>Clostridia</i>                     | -0.058                        | 0.087                      | 0.000  | 0.133          | 0.300   | -0.236    | 0.262    | -0.093    | -0.130 | -0.096    | 0.017            | -0.072 |
|      | <i>Negativicutes</i>                  | 0.148                         | -0.140                     | -0.021 | -0.177         | -0.294  | 0.038     | -0.117   | -0.088    | -0.050 | 0.005     | 0.016            | -0.080 |
|      | <i>Actinobacteria</i>                 | 0.082                         | 0.382*                     | -0.258 | -0.075         | -0.113  | 0.167     | -0.212   | 0.052     | 0.067  | -0.040    | 0.260            | 0.078  |
|      | Order                                 |                               |                            |        |                |         |           |          |           |        |           |                  |        |
|      | <i>Clostridiales</i>                  | -0.058                        | 0.087                      | 0.000  | 0.133          | 0.300   | -0.236    | 0.262    | -0.093    | -0.130 | -0.096    | 0.017            | -0.072 |
|      | <i>Selenomonadales</i>                | 0.148                         | -0.140                     | -0.021 | -0.177         | -0.294  | 0.038     | -0.117   | -0.088    | -0.050 | 0.005     | 0.016            | -0.080 |
|      | <i>Bifidobacteriales</i>              | 0.115                         | .330*                      | -0.193 | -0.128         | -0.181  | 0.121     | -0.297   | 0.072     | 0.043  | -0.058    | 0.288            | 0.049  |
|      | Family                                |                               |                            |        |                |         |           |          |           |        |           |                  |        |
|      | <i>Ruminococcaceae</i>                | 0.038                         | -0.268                     | 0.083  | -0.003         | 0.231   | -0.083    | -0.047   | 0.171     | 0.158  | -0.079    | -0.023           | 0.218  |
|      | <i>Veillonellaceae</i>                | 0.163                         | 0.000                      | 0.071  | -0.172         | -0.288  | 0.146     | -0.116   | 0.040     | 0.053  | -0.080    | 0.014            | -0.085 |
|      | <i>Bifidobacteriaceae</i>             | 0.115                         | 0.330*                     | -0.193 | -0.128         | -0.181  | 0.121     | -0.297   | 0.072     | 0.043  | -0.058    | 0.288            | 0.049  |
|      | <i>Actinomycetaceae</i>               | -0.006                        | 0.191                      | -0.132 | 0.302          | 0.018   | 0.205     | 0.131    | 0.034     | -0.050 | -0.006    | 0.044            | 0.048  |
|      | Genus                                 |                               |                            |        |                |         |           |          |           |        |           |                  |        |
|      | <i>Faecalibacterium</i>               | -0.084                        | -0.142                     | -0.037 | 0.084          | 0.212   | 0.251     | 0.116    | 0.061     | -0.013 | -0.240    | -0.023           | 0.043  |
|      | <i>Gemmiger</i>                       | 0.024                         | -0.239                     | -0.197 | 0.143          | 0.031   | 0.046     | -0.087   | 0.216     | 0.006  | -0.183    | -0.127           | 0.147  |
|      | <i>Ruminococcus</i>                   | -0.110                        | -0.121                     | 0.361* | -0.203         | 0.163   | -0.126    | -0.226   | 0.124     | 0.079  | 0.008     | 0.165            | 0.082  |
|      | <i>Lachnospiraceae_incertae_sedis</i> | -0.015                        | -0.153                     | 0.265  | -0.055         | 0.203   | -0.176    | 0.037    | 0.193     | 0.069  | -0.121    | -0.161           | 0.021  |
|      | <i>Bifidobacterium</i>                | 0.115                         | 0.330*                     | -0.193 | -0.128         | -0.181  | 0.121     | -0.297   | 0.072     | 0.043  | -0.058    | 0.288            | 0.049  |
|      | <i>Actinomyces</i>                    | -0.004                        | 0.179                      | -0.120 | 0.299          | 0.017   | 0.202     | 0.144    | 0.039     | -0.055 | -0.001    | 0.053            | 0.046  |
|      | <i>Parabacteroides</i>                | 0.061                         | -0.106                     | 0.092  | -0.015         | -0.167  | 0.133     | 0.143    | -0.049    | 0.100  | 0.097     | 0.000            | 0.145  |

Spearman's rank correlation coefficient.

\*: q-value(False Discovery Rate (Benjamini &amp; Hochberg)) &lt; 0.05

Supplementary Table S5. Correlation of the amount of the change for one year between food and bacteria abundance (H1-H2).

|      |                                       | Soybeans and<br>soybean foods | Green/yellow<br>vegetables | Fruit    | Fish/shellfish | Pickles  | Mushrooms | Seaweeds | Green tea | Rice   | Miso soup | Beef and<br>pork | Coffee |
|------|---------------------------------------|-------------------------------|----------------------------|----------|----------------|----------|-----------|----------|-----------|--------|-----------|------------------|--------|
| Oral | Genus                                 |                               |                            |          |                |          |           |          |           |        |           |                  |        |
|      | <i>Alloprevotella</i>                 | 0.013                         | -0.032                     | -0.023   | 0.007          | 0.033    | 0.019     | -0.054   | 0.130     | 0.046  | -0.011    | 0.123            | 0.102  |
| Gut  | Phylum                                |                               |                            |          |                |          |           |          |           |        |           |                  |        |
|      | <i>Firmicutes</i>                     | -0.017                        | -0.086                     | -0.112   | 0.025          | -0.036   | 0.011     | -0.185*  | 0.031     | -0.031 | -0.101    | 0.032            | 0.106  |
|      | <i>Actinobacteria</i>                 | -0.006                        | -0.120                     | 0.089    | 0.059          | -0.029   | -0.023    | 0.064    | 0.033     | -0.031 | 0.008     | -0.003           | -0.005 |
|      | Class                                 |                               |                            |          |                |          |           |          |           |        |           |                  |        |
|      | <i>Clostridia</i>                     | -0.004                        | -0.091                     | -0.157   | 0.048          | -0.079   | 0.027     | -0.170   | 0.018     | 0.014  | -0.024    | -0.015           | 0.092  |
|      | <i>Negativicutes</i>                  | 0.026                         | 0.194*                     | 0.095    | -0.033         | 0.074    | -0.036    | -0.007   | -0.106    | -0.033 | -0.154    | 0.066            | -0.083 |
|      | <i>Actinobacteria</i>                 | -0.006                        | -0.120                     | 0.089    | 0.059          | -0.029   | -0.023    | 0.064    | 0.033     | -0.031 | 0.008     | -0.003           | -0.005 |
|      | Order                                 |                               |                            |          |                |          |           |          |           |        |           |                  |        |
|      | <i>Clostridiales</i>                  | -0.004                        | -0.091                     | -0.157   | 0.048          | -0.078   | 0.027     | -0.170   | 0.018     | 0.014  | -0.024    | -0.016           | 0.093  |
|      | <i>Selenomonadales</i>                | 0.026                         | 0.194*                     | 0.095    | -0.033         | 0.074    | -0.036    | -0.007   | -0.106    | -0.033 | -0.154    | 0.066            | -0.083 |
|      | <i>Bifidobacteriales</i>              | -0.047                        | -0.066                     | 0.034    | 0.094          | -0.027   | -0.047    | 0.111    | -0.012    | -0.049 | 0.069     | 0.006            | -0.031 |
|      | Family                                |                               |                            |          |                |          |           |          |           |        |           |                  |        |
|      | <i>Ruminococcaceae</i>                | -0.018                        | -0.021                     | -0.272** | -0.037         | -0.228** | -0.122    | -0.126   | 0.019     | 0.079  | 0.047     | 0.112            | 0.081  |
|      | <i>Veillonellaceae</i>                | -0.022                        | 0.097                      | 0.109    | -0.081         | 0.067    | -0.038    | 0.075    | -0.043    | 0.004  | -0.168    | 0.026            | 0.001  |
|      | <i>Bifidobacteriaceae</i>             | -0.047                        | -0.066                     | 0.034    | 0.094          | -0.027   | -0.047    | 0.111    | -0.012    | -0.049 | 0.069     | 0.006            | -0.031 |
|      | <i>Actinomycetaceae</i>               | 0.040                         | -0.132                     | 0.132    | -0.069         | 0.067    | -0.040    | .180*    | -0.077    | -0.107 | -0.150    | 0.027            | 0.042  |
|      | Genus                                 |                               |                            |          |                |          |           |          |           |        |           |                  |        |
|      | <i>Faecalibacterium</i>               | 0.050                         | -0.021                     | -0.105   | -0.057         | -0.075   | -0.076    | 0.017    | -0.001    | 0.023  | -0.051    | 0.052            | 0.077  |
|      | <i>Gemmiger</i>                       | -0.233**                      | 0.067                      | -0.160   | 0.027          | 0.160    | -0.042    | -0.122   | 0.017     | -0.024 | -0.007    | 0.097            | 0.066  |
|      | <i>Ruminococcus</i>                   | -0.008                        | -0.099                     | -0.125   | -0.072         | -0.206*  | -0.104    | -0.119   | -0.059    | 0.183* | 0.134     | 0.019            | 0.142  |
|      | <i>Lachnospiraceae_incertae_sedis</i> | -0.098                        | 0.043                      | 0.019    | 0.143          | 0.076    | -0.003    | 0.085    | -0.043    | 0.018  | 0.090     | 0.025            | -0.024 |
|      | <i>Bifidobacterium</i>                | -0.047                        | -0.067                     | 0.034    | 0.095          | -0.029   | -0.047    | 0.110    | -0.013    | -0.050 | 0.068     | 0.006            | -0.030 |
|      | <i>Actinomyces</i>                    | 0.022                         | -0.102                     | 0.140    | -0.046         | 0.058    | -0.024    | 0.205*   | -0.096    | -0.123 | -0.150    | 0.030            | 0.035  |
|      | <i>Parabacteroides</i>                | 0.040                         | 0.237**                    | 0.023    | -0.060         | 0.069    | 0.073     | -0.071   | 0.086     | 0.016  | -0.142    | 0.058            | -0.017 |

Spearman's rank correlation coefficient.

\*: q-value(False Discovery Rate (Benjamini &amp; Hochberg)) &lt; 0.05, \*\*: q-value(False Discovery Rate (Benjamini &amp; Hochberg)) &lt; 0.01

Supplementary Figure S1. Comparison of the diversity of oral microbiota among the four groups.

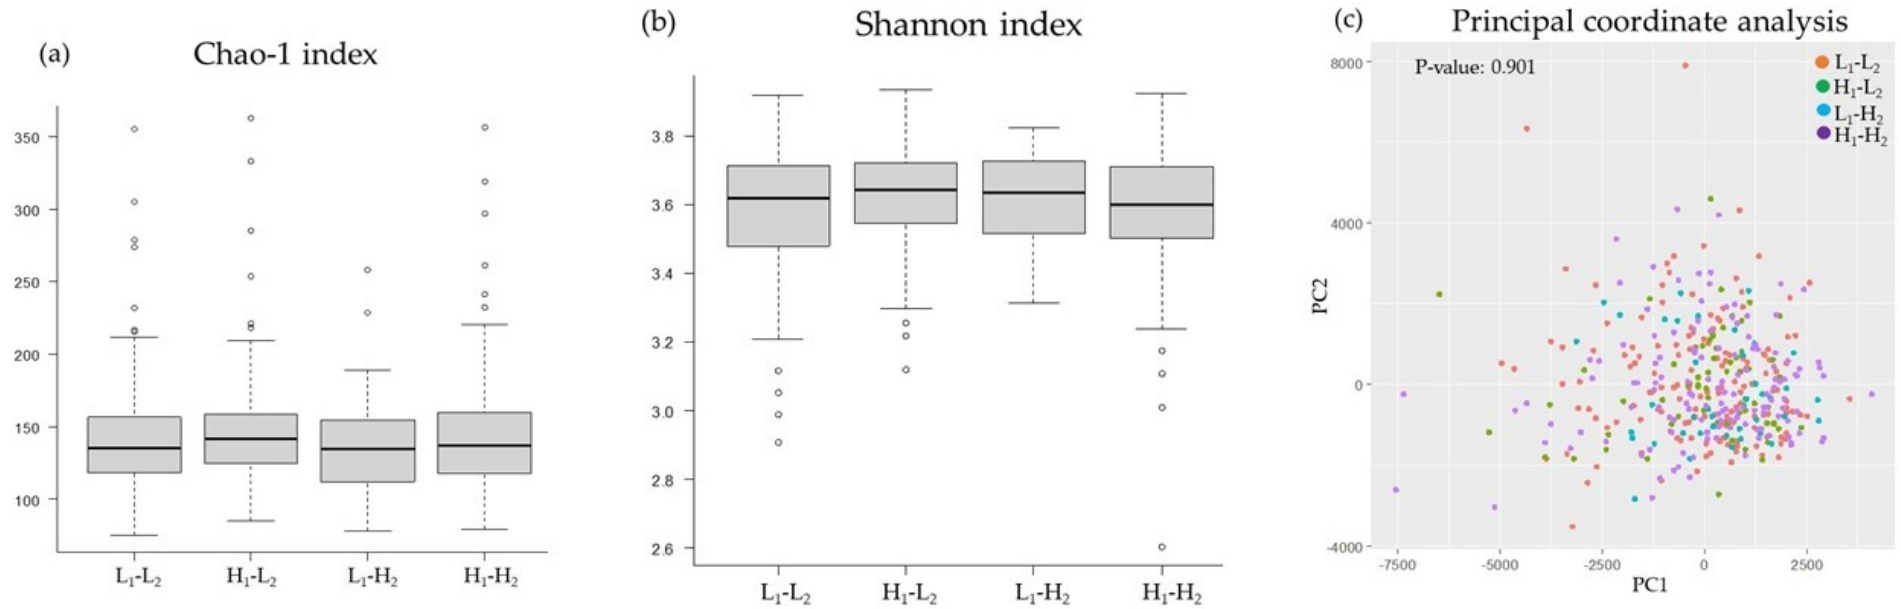

$L_1-L_2$ : mJDI12  $\leq 6$  in 2017 and 2018;  $H_1-L_2$ : mJDI12  $\geq 7$  in 2017 and  $\leq 6$  in 2018;  $L_1-H_2$ : mJDI12  $\leq 6$  in 2017 and mJDI12  $\geq 7$  in 2018; and  $H_1-H_2$ : mJDI12  $\geq 7$  in 2017 and 2018.

Supplementary Figure S2. Comparison of the diversity of gut microbiota among the four groups.

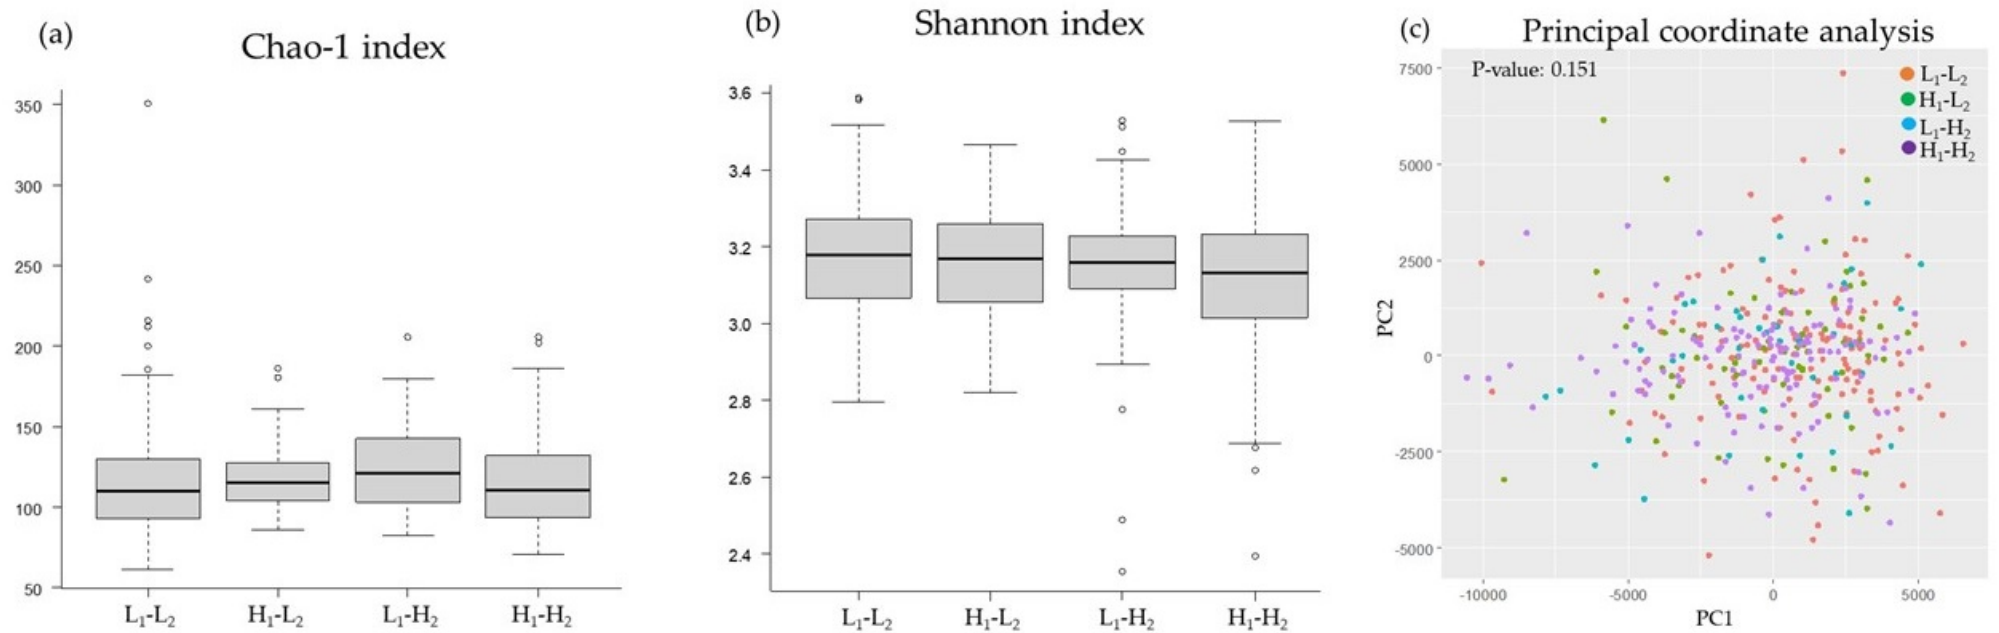

L<sub>1</sub>-L<sub>2</sub>: mJDI12 ≤ 6 in 2017 and 2018; H<sub>1</sub>-L<sub>2</sub>: mJDI12 ≥ 7 in 2017 and ≤ 6 in 2018; L<sub>1</sub>-H<sub>2</sub>: mJDI12 ≤ 6 in 2017 and mJDI12 ≥ 7 in 2018; and H<sub>1</sub>-H<sub>2</sub>: mJDI12 ≥ 7 in 2017 and 2018.
